# Supplementary material for: Pharmacological Blockade of the Adenosine A2B Receptor Is Protective of Proteinuria in Diabetic Rats, through Affecting Focal Adhesion Kinase Activation and the Adhesion Dynamics of Podocytes
Source: MDPI journal article supplement (doi:10.3390/cells13100846), 2024-05-16
Supplement: s1 [file s1]

## Supplementary Figure S1

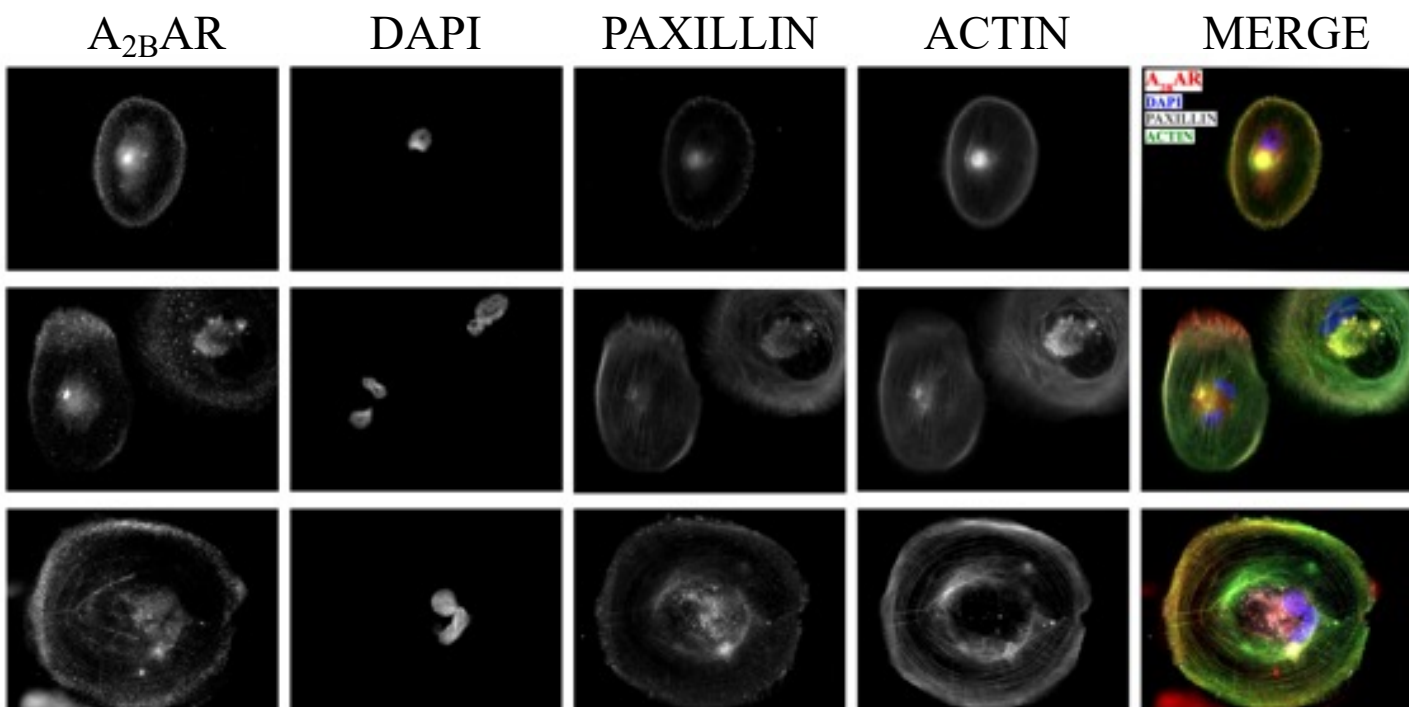

Indirect immunofluorescence in human immortalized podocytes for the detection of A<sub>2B</sub>AR. Podocytes differentiated 30 days were seeded on laminin-coated coverslips, allowed to spread during 40 minutes, fixed and subjected to immunostaining as indicated in the methods section. The distribution pattern of A<sub>2B</sub>AR appears mostly perinuclear and at the cell's periphery in lamellipodium. Representative images were captured by epifluorescence microscopy.

Supplementary Figure S2

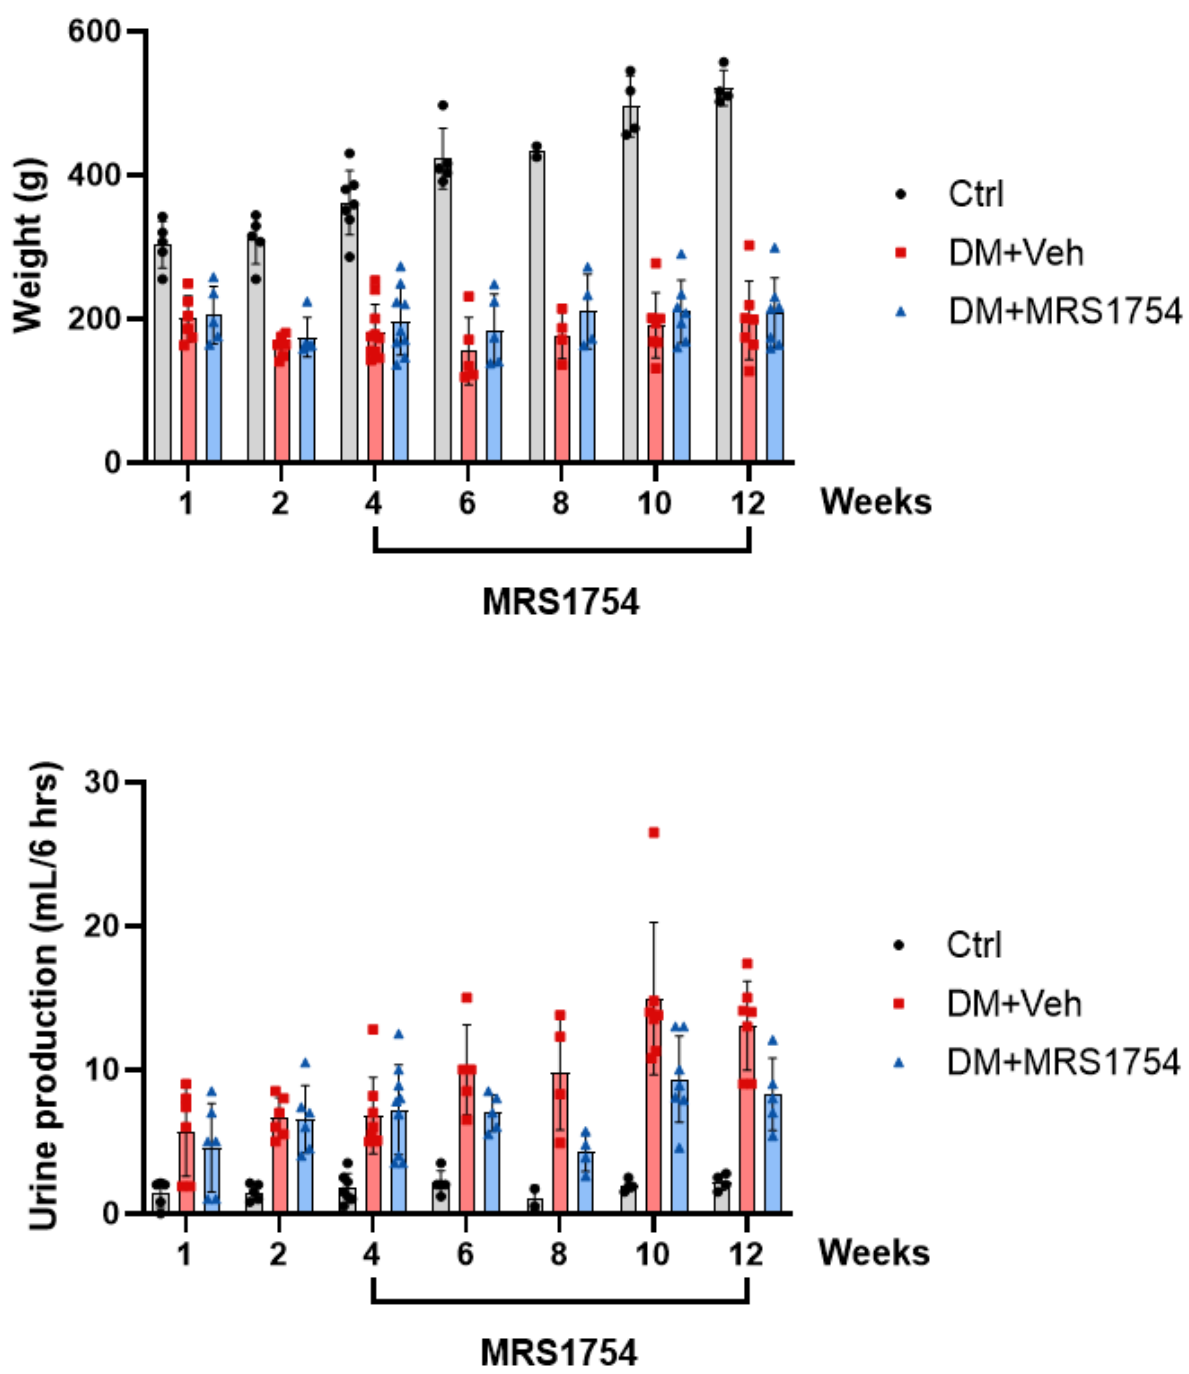

Physiological parameters of rats used in the study.
